# Supplementary material
Source: PubMed Central journal article supplement (PMC8359181)
Supplement: JLB-110-357-s003.pdf [file JLB-110-357-s003.pdf]

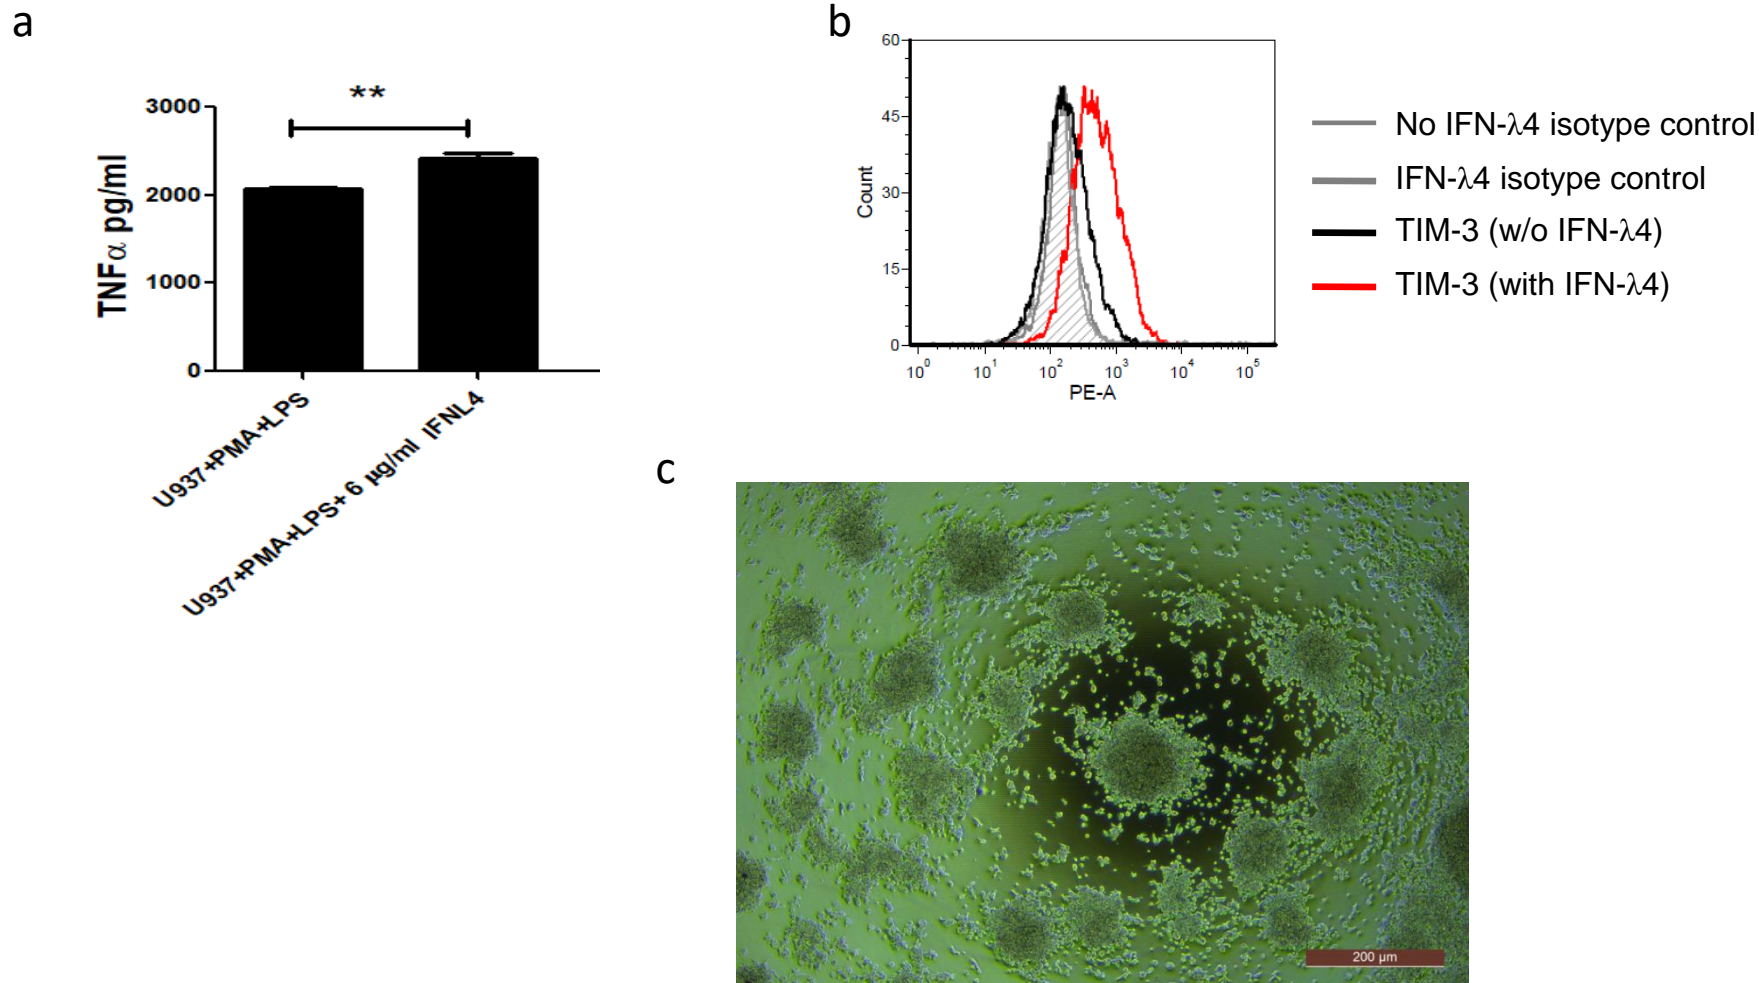

**Suppl. Fig. 1:** **(a)** TNF- $\alpha$  secretion was measured by enzyme-linked immunosorbent assay from cell-free supernatants of U937 cells treated with PMA in the absence or presence of IFN- $\lambda$ 4 for 48 h followed by incubation with LPS (pre-treatment strategy). **(b)** IFN- $\lambda$ 4 (6  $\mu$ g/mL)-treated THP-1 macrophage-like cells activated with LPS show increased surface expression of TIM-3. **(c)** Microscopic image (amplification:  $\times 10$ ) of THP-1-derived M2 macrophage-like cells differentiated in the presence of IFN- $\lambda$ 4 (6  $\mu$ g/mL).
